# **Cortical tethering of mitochondria by the dynein anchor Mcp5 enables uniparental mitochondrial inheritance during fission yeast meiosis**

**Kritika Mehta<sup>a</sup> and Vaishnavi Ananthanarayanan<sup>a,\*</sup>**

<sup>a</sup>Centre for BioSystems Science and Engineering, Indian Institute of Science, Bangalore  
560012

\* To whom correspondence should be addressed: [vaishnavi@iisc.ac.in](mailto:vaishnavi@iisc.ac.in)

## 1 **Summary**

2           During sexual reproduction in eukaryotes, processes such as active degradation and  
3 dilution of paternal mitochondria ensure maternal mitochondrial inheritance. In the  
4 isogamous organism fission yeast, we employed high-resolution fluorescence microscopy to  
5 visualize mitochondrial inheritance during meiosis by differentially labeling mitochondria of  
6 the two parental cells. Remarkably, mitochondria, and thereby, mitochondrial DNA from the  
7 parental cells did not mix upon zygote formation, but remained segregated at the poles by  
8 attaching to clusters of the dynein anchor Mcp5 via its coiled-coil domain. We observed that  
9 this tethering of parental mitochondria to the poles results in uniparental inheritance of  
10 mitochondria, wherein two of the four spores formed subsequently contained mitochondria  
11 from one parent and the other spores, mitochondria from the other parent. Further, the  
12 presence of dynein on an Mcp5 cluster precluded the attachment of mitochondria to the  
13 same cluster. Taken together, we reveal a distinct mechanism that achieves uniparental  
14 inheritance by segregation of parental mitochondria.

15

## 16 **Keywords**

17 Mitochondria, mitochondrial inheritance, uniparental inheritance, Mcp5, fission yeast,  
18 microscopy, meiosis

19

20

## 21 Introduction

22 Mitochondria are cellular organelles responsible for the generation of energy-rich  
23 adenosine triphosphate molecules in eukaryotic cells. In addition to this and other essential  
24 functions, mitochondria carry their own genetic material in the form of mitochondrial DNA  
25 (mtDNA) nucleoids. During meiosis, in contrast to the nuclear genome, mitochondrial genes  
26 follow a non-Mendelian pattern of segregation through tightly controlled mechanisms that  
27 typically favor uniparental inheritance, or the passing down of mitochondria predominantly  
28 from a single parent to the progeny. In several eukaryotes, maternal inheritance is the  
29 preferred mode of uniparental inheritance. Maternal inheritance is brought about by one of  
30 many ways including subjecting paternal mitochondria to (i) sequestration and exclusion (Yu  
31 and Russell, 1992), (ii) selective lysosomal degradation via ubiquitination (Sutovsky et al.,  
32 1999, 2000), (iii) simple dilution due to the large size of the female gamete in comparison to  
33 the male gamete (Birky, 1995; Wilson and Xu, 2012). Uniparental mitochondrial inheritance  
34 has been suggested to be important for preventing the propagation of selfish cytoplasmic  
35 transposable elements that could affect the nuclear genome (Hoekstra, 2000; Murlas  
36 Cosmides and Tooby, 1981).

37 In the unicellular eukaryote budding yeast *Saccharomyces cerevisiae*, mitochondria  
38 are biparentally inherited by the meiotic progeny due to mixing of mitochondria from both  
39 parental cells upon zygote formation (Strausberg and Perlman, 1978; Thomas and Wilkie,  
40 1968; Zinn et al., 1987). However, mitochondrial DNA (mtDNA) that occur in the form of  
41 nucleoids seemingly remain anchored to their original locations in the zygote, thereby giving  
42 rise to a homoplasmic cells within a few rounds of vegetative division following sporulation  
43 (Nunnari et al., 1997). During mitosis in *S. cerevisiae*, mitochondria in the mother cell are  
44 tethered to the cell membrane via the mitochondria-ER cortex anchor (MECA) structure

45 containing the protein Num1 (Lackner et al., 2013; Ping et al., 2016). Tethering of  
46 mitochondria by Num1 aids in the retention of a mitochondrial population within the mother  
47 cell (Lackner et al., 2013), while another population is transported on actin cables to the bud  
48 by the activity of the myosin V, Myo2 (Altmann et al., 2008; Förtsch et al., 2011). The Num1  
49 homologue in fission yeast (*Schizosaccharomyces pombe*), Mcp5 is expressed specifically  
50 during prophase I of meiosis (Saito et al., 2006; Yamashita and Yamamoto, 2006), and is  
51 required for the anchoring and thereby, activation of the motor protein cytoplasmic dynein  
52 that powers the oscillatory movement of the zygotic horsetail-shaped nucleus  
53 (Ananthanarayanan et al., 2013; Tolic et al., 2009; Yamamoto et al., 1999).

54 Interphase mitochondria in fission yeast remain associated with microtubules and  
55 their fission dynamics are dictated by the dynamics of the underlying microtubules (Chiron et  
56 al., 2008; Fu et al., 2011; Yaffe et al., 1996). This relationship between microtubules and  
57 mitochondria is also essential for independent segregation of mitochondria during mitosis  
58 (Mehta et al., 2019). However, it is unclear how mitochondria are segregated between the  
59 four spores that result from meiotic cell division in fission yeast. It has been suggested that  
60 like *S. cerevisiae*, *S. pombe* also undergoes biparental mitochondrial inheritance in crosses  
61 between strains resistant and sensitive to antibiotics (Thraill et al., 1980), but direct  
62 evidence for this process in wild-type cells has been lacking.

63 Here, we report that fission yeast cells in fact undergo uniparental mitochondrial  
64 inheritance during meiosis due to the tethering of mitochondria to the cortex during the initial  
65 stages of meiosis. Our results thus reveal a unique mechanism for facilitating uniparental  
66 inheritance that relies on physical segregation of parental mitochondria in a heteroplasmic  
67 zygote by the activity of the dynein anchor Mcp5.

68

69 **Results**

70 **Mitochondria are preferentially localized at the poles of meiotic cells**

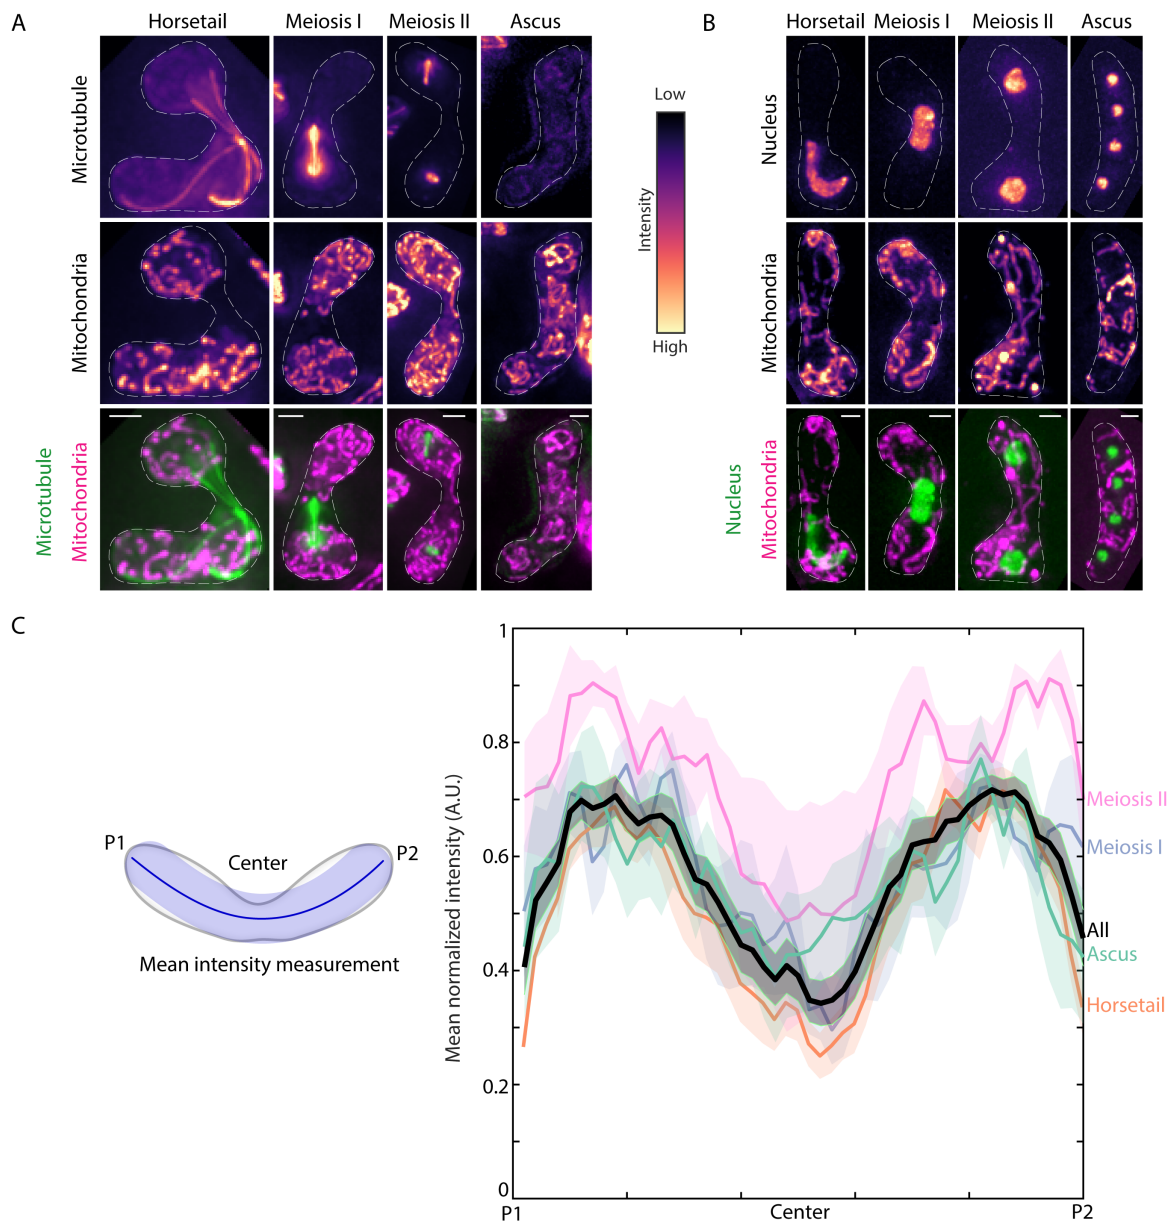

71

72 **Figure 1. Mitochondria remain close to the cell poles during meiosis. (A)** Maximum intensity-  
 73 projected images of microtubules (top) and mitochondria (middle) represented in the  
 74 intensity map to the right of the images, and their merge (bottom) during the different stages  
 75 of meiosis indicated (strain KI001xPT1651, see Table S1). **(B)** Maximum intensity-projected  
 76 images of the nucleus (top) and mitochondria (middle) represented in the intensity map to  
 77 the left of the images, and their merge (bottom) during the different stages of meiosis  
 78 indicated (strain FY15112, see Table S1). In A and B, scale bars represent 2 $\mu$ m, dashed white  
 79 lines represent cell outlines. **(C)** Schematic (left) of the mean intensity measurement along

80 the length of a zygote from pole 'P1', through the 'Center', to pole 'P2'. Plot of mean  
81 normalized intensities (right) from different stages of meiosis (colored lines) and their  
82 combined mean intensities (black line,  $n=24$ ) obtained from the data in A. The shaded regions  
83 represent the standard error of the mean (SEM).

84

85 To the best of our knowledge, there exists no comprehensive study on the changes of  
86 the mitochondrial network upon onset of meiosis in fission yeast. Therefore, we first set out  
87 to visualize mitochondria during the fission yeast meiotic cycle. We achieved this by inducing  
88 meiosis in parental cells that had fluorescently labeled mitochondria and microtubules (Figure  
89 1A, Movie S1), or mitochondria and nucleus (Figure 1B, Movie S2).

90 Based on the microtubule organization and the nuclear morphology, the discernible  
91 stages of meiosis were designated as 'horsetail', 'meiosis I', 'meiosis II' and 'ascus' (Cipak et  
92 al., 2014). In contrast to interphase mitochondria, during meiosis, mitochondria appeared  
93 predominantly fragmented and detached from the microtubules (e.g.: Figure 1A, 'horsetail').  
94 Further, the mean normalized intensity of mitochondria across the cell for all stages revealed  
95 preferential localization of mitochondria to the poles of the cell (Figure 1C).

#### 96 ***Parental mitochondria do not mix upon zygote formation***

97 Next, we sought to understand how mitochondria are inherited during fission yeast  
98 meiosis. To this end, we employed cells of opposite mating types whose mitochondria were  
99 labelled with different fluorophores, GFP and RFP. We induced meiosis in these cells and  
100 observed mitochondrial organization during the early horsetail stage and in the final stage,  
101 post formation of ascospores. Interestingly, we observed that the differently labelled  
102 mitochondria from the parental cells remained segregated at the poles of the cell and did not  
103 undergo any mixing in the early stage (Figure 2A, top, Movie S3). Upon formation of spores  
104 within the ascus, mitochondria remained predominantly unmixed, with two of the spores

105 exhibiting higher GFP signal and the two other, higher RFP signal (Figure 2A, bottom, Movie  
 106 S4). These observations were consistent with our measurement of normalized mean  
 107 mitochondrial intensities across the length of the cell (Figure 2B). We additionally visualized  
 108 meiotic mitochondrial inheritance in a cross between a cell containing fluorescently-labeled  
 109 mitochondria and a cell containing unlabeled mitochondria. Here too, we observed  
 110 localization of mitochondrial signal to one side of the zygote and two spores of the resulting  
 111 ascus (Figure S1A, B).

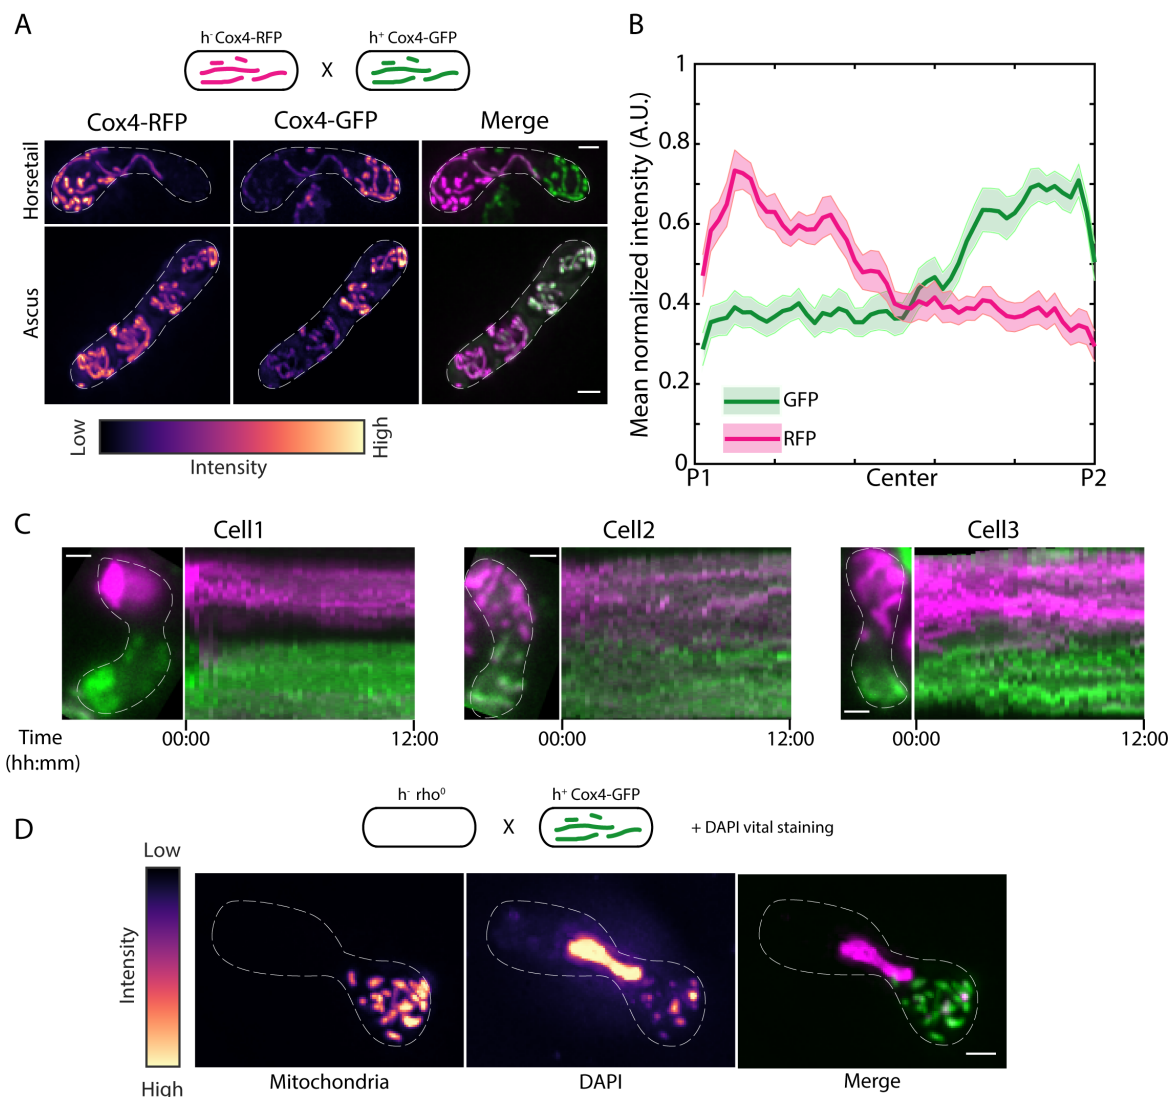

112  
 113 **Figure 2: Parental mitochondria remain segregated upon conjugation. (A)** Schematic of the  
 114 cross performed (top, strain PT1650xPT1651, see Table S1), maximum intensity-projected  
 115 images of mitochondria labeled with Cox4-RFP (left) and Cox4-GFP (center) represented in

116 the intensity map to the bottom of the images, and their merge (right) during the early stage  
117 ('Horsetail', top) and late stage ('Ascus', bottom) of meiosis. **(B)** Plot of mean normalized  
118 intensities of RFP (magenta line) and GFP (green line) across the length of the cell from the  
119 cross indicated in A ( $n=18$ ). Shaded regions represent SEM. **(C)** Representative maximum  
120 intensity-projected images (left) and kymographs of time-lapse movies (right) of meiotic cells  
121 resulting from the cross indicated in A. Time is indicated below the images in hh:mm. **(D)**  
122 Schematic of the cross and DAPI vital staining performed (top, strain PHP14xPT1650, see  
123 Table S1), maximum intensity-projected images of mitochondria labeled with Cox4-GFP (left)  
124 and mtDNA ('DAPI', center) represented in the intensity map to the left of the images, and  
125 their merge (right). In A, C and D, scale bars represent  $2\mu\text{m}$ , dashed white lines represent cell  
126 outlines.

127

128 In all these experiments, the mitochondrial inner membrane protein Cox4 was used  
129 as a fluorescent reporter for the mitochondria. To rule out any effects from differential  
130 dynamics of the mitochondrial compartments (Sukhorukov et al., 2010), we employed  
131 another fluorescent reporter protein for the mitochondrion that resides in the mitochondrial  
132 matrix, aconitase (Aco1) tagged with GFP. Again, we observed segregation of the  
133 mitochondria in meiotic cells resulting from a cross between cells with unlabeled  
134 mitochondria and cells with mitochondria labeled with Aco1-GFP (Figure S1C, D).

135 The segregation of mitochondria that we observed could result from a scenario where  
136 mitochondria underwent mixing upon zygote formation, but then subsequently de-mixed via  
137 a different process. To test if this occurred, we acquired long-term time-lapse videos of fission  
138 yeast cells undergoing meiosis. Again, we employed parental cells with differently labeled  
139 mitochondria. We observed that the segregation of mitochondria occurred very early in the  
140 meiotic cycle and was maintained during the later stages ( $n = 13$ , Figure 2C, Movie S5).



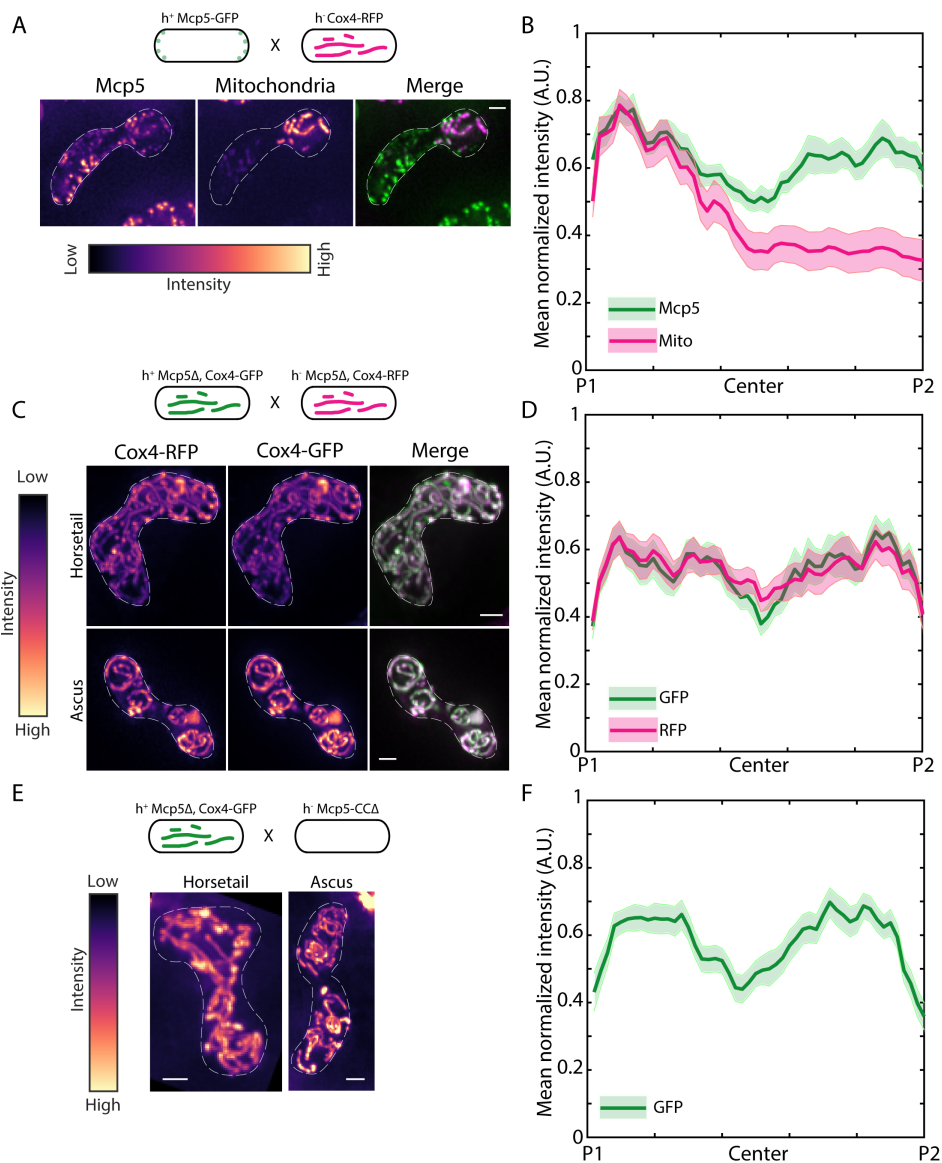

141

142 **Figure 3: Mcp5 is essential for mitochondrial tethering to the cortex.** (A) Schematic of the  
 143 cross performed (top, strain FY16854xPT1651, see Table S1), maximum intensity-projected  
 144 images of Mcp5 labeled with GFP (left) and mitochondria labeled with Cox4-RFP (center)  
 145 represented in the intensity map to the bottom of the images, and their merge (right). (B)  
 146 Plot of mean normalized intensities of Mcp5 (green line) and mitochondria (magenta line)  
 147 across the length of the cell from the cross indicated in A ( $n=14$ ). (C) Schematic of the cross  
 148 performed (top, strain VA066xVA074, see Table S1), maximum intensity-projected images of  
 149 mitochondria labeled with Cox4-RFP (left) and mitochondria labeled with Cox4-GFP (center)  
 150 represented in the intensity map to the left of the images, and their merge (right) during the  
 151 early stage ('Horsetail', top) and late stage ('Ascus', bottom) of meiosis. (D) Plot of mean  
 152 normalized intensities of RFP (magenta line) and GFP (green line) across the length of the cell

153 from the cross indicated in C ( $n=18$ ). **(E)** Schematic of the cross performed (top, strain  
154 FY16897xVA074, see Table S1), maximum intensity-projected images of mitochondria labeled  
155 with Cox4-GFP during the early stage ('Horsetail', left) and late stage ('Ascus', right) of meiosis  
156 represented in the intensity map to the left of the images. **(F)** Plot of mean normalized  
157 intensity of GFP (green line) across the length of the cell from the cross indicated in E ( $n=21$ ).  
158 In A, C, and E, scale bars represent  $2\mu\text{m}$ , dashed white lines represent cell outlines. In B, D  
159 and F, shaded regions represent SEM.

160

161 To confirm that the segregation of parental mitochondria resulted in  
162 segregation of the parental mitochondrial DNA (mtDNA), we first set up a cross between a  
163 cell expressing fluorescently labeled mitochondria and a cell lacking mtDNA nucleoids ( $\text{rho}^0$ )  
164 (Haffter and Fox, 1992). Then, we labeled mtDNA by vital 4',6-Diamidino-2-phenylindole  
165 dihydrochloride (DAPI) staining of the resulting zygote (Williamson and Fennell, 1979). In such  
166 a scenario, all the mtDNA in the products of this cross would originate from the non- $\text{rho}^0$   
167 parental cell. Accordingly, we again observed mitochondrial segregation in the zygote and  
168 also observed complete colocalization between the labeled mitochondria and mtDNA ( $n = 11$ ,  
169 Figure 2D, Movie S6). These results indicate that mitochondria and hence mtDNA of the  
170 parental cells remain segregated during meiosis and are thereby uniparentally inherited in  
171 the meiotic progeny.

### 172 ***The dynein anchor Mcp5 tethers mitochondria to the poles during prophase I of meiosis***

173 In budding yeast, the Mcp5 homologue Num1 forms a part of the MECA structure and  
174 is essential for retention of mitochondria in the mother cell while the Myo2 motor carries  
175 mitochondria to the bud on actin cables (Lackner et al., 2013). The mitochondrial localization  
176 at the poles that we observed (Fig. 1 and Fig. 2A) was reminiscent of the organization of Mcp5  
177 spots at the cortex (Saito et al., 2006; Thankachan et al., 2017; Yamashita and Yamamoto,  
178 2006). Mcp5 clusters into about 30 foci containing  $\sim 10$  molecules per focus, preferentially at

179 the cell poles (Thankachan et al., 2017). Additionally, Mcp5 is a meiosis-specific protein that  
180 is expressed predominantly during meiotic prophase in fission yeast, when it anchors dynein  
181 to enable oscillations of the horsetail nucleus (Saito et al., 2006; Yamashita and Yamamoto,  
182 2006).

183 Therefore, to test if mitochondria were also being anchored by Mcp5 in fission yeast,  
184 we first visualized zygotes which expressed fluorescently labelled mitochondria and Mcp5.  
185 We observed complete colocalization between mitochondria at the cortex and Mcp5 foci  
186 (Figure 3A). In this cross, GFP-labelled Mcp5 was expressed from only one of the parents and  
187 RFP-labeled Cox4 was expressed from the other. Interestingly, while Mcp5's signal was visible  
188 at both poles of the cell, mitochondrial signal was again restricted to one pole (Figure 3B,  
189 Movie S7, Figures. S2A, S2B), indicating that there were no barriers to diffusion or mixing of  
190 other proteins in the zygote. Additionally, mitochondria continued to remain dissociated from  
191 the microtubules when bound to Mcp5 (Figure S2C), as observed in Figure 1A. To verify that  
192 the attachment to microtubules was not necessary for segregation during meiosis, we  
193 employed parental cells lacking the microtubule-mitochondrial linker protein Mmb1 (Fu et  
194 al., 2011). Additionally, one of the parental cells had its mitochondria fluorescently labeled.  
195 In zygotes and asci resulting from this cross, we observed that parental mitochondria  
196 continued to remain segregated (Figures S2D, S2E).

197 We then proceeded to set up a cross between cells lacking Mcp5, but with GFP- and  
198 RFP- labeled mitochondria. In stark contrast to wild-type zygotes, these Mcp5 $\Delta$  meiotic cells  
199 showed complete mixing of parental mitochondria in both early and late stages (Figure 3C,  
200 Movie S8). These observations were also substantiated by measurement of GFP and RFP  
201 intensities across the length of the cell during all stages of meiosis (Figure 3D, Movie S9).

202 Mcp5 comprises of a pleckstrin-homology domain, which is essential for its  
203 attachment to the membrane, and a coiled-coil (CC) domain, that is required for its binding  
204 to dynein (Ananthanarayanan, 2016; Saito et al., 2006; Yamashita and Yamamoto, 2006). We  
205 asked if the CC domain was also responsible for Mcp5's attachment to the mitochondria. To  
206 answer this, we visualized mitochondrial distribution in a cross between a parental cell lacking  
207 Mcp5's CC domain and the other parent with the genotype  $Mcp5\Delta$ , Cox4-GFP. If  
208 mitochondrial tethering by Mcp5-CC $\Delta$  was intact, we would observe an intensity pattern  
209 similar to that in Figure S1A or S2A. However, we saw that the fluorescence from the  
210 mitochondria was distributed throughout the cell in both early and late stages (Figure 3E and  
211 F, Movies S10 and S11), indicating that Mcp5 indeed employs its CC domain to tether  
212 mitochondria to the cortex during meiotic prophase I.

### 213 ***Dynein-Mcp5 spots on the membrane are devoid of mitochondria***

214 When deleting Mcp5 to test its role in mitochondrial tethering, we not only knocked  
215 down Mcp5, but also abrogated the oscillations that occur during the meiotic prophase (Saito  
216 et al., 2006; Thankachan et al., 2017; Yamashita and Yamamoto, 2006). To delineate the  
217 specific role of the oscillations, if any, in facilitating parental mitochondrial segregation, we  
218 sought to attenuate the oscillations of the horsetail nucleus while keeping Mcp5 intact. To  
219 this end, we employed cells lacking the motor protein cytoplasmic dynein, which is essential  
220 to power the oscillations (Yamamoto et al., 1999), but has no effect on Mcp5 localization at  
221 the cortex (Saito et al., 2006; Yamashita and Yamamoto, 2006). We set up a cross between  
222 parental cells containing a deletion of the dynein heavy chain (Dhc1) gene, but containing  
223 differently labeled mitochondria, and visualized the distribution of mitochondria in the  
224 resulting zygotes and asci. We observed that the parental mitochondria remained segregated

225 in both horsetail zygotes as well and asci (Figures 4A and B, Movie S12 and S13) indicating  
 226 that the nuclear oscillations had no role to play in the segregation of parental mitochondria.

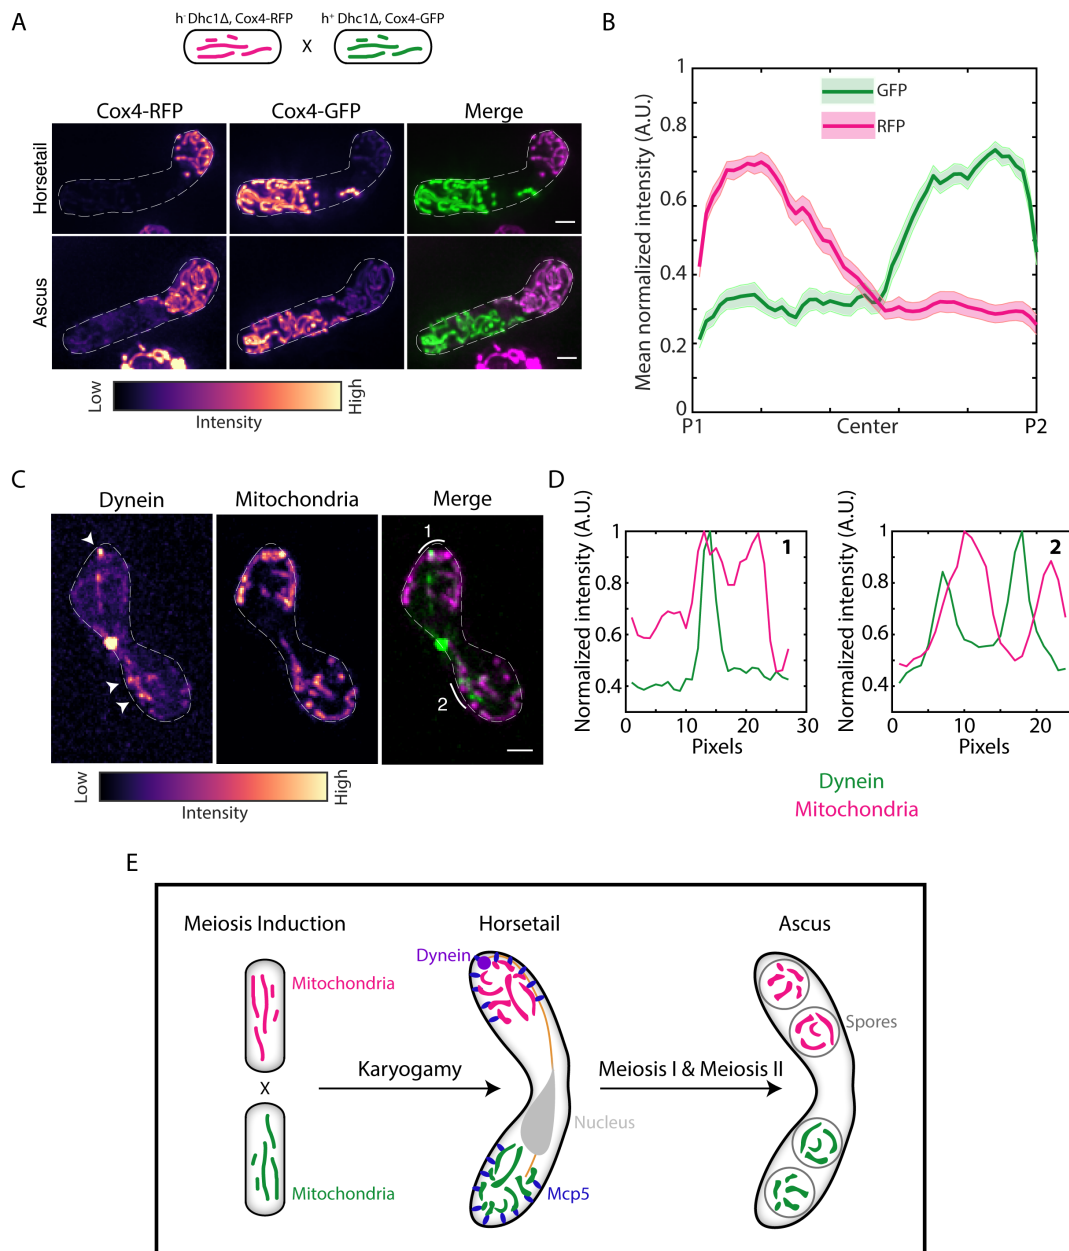

227

228 **Figure 4: Dynein and mitochondria do not bind to the same Mcp5 foci.** (A) Schematic of the  
 229 cross performed (top, strain VA091xVA092, see Table S1), maximum intensity-projected  
 230 images of mitochondria labeled with Cox4-RFP (left) and mitochondria labeled with Cox4-GFP  
 231 (center) represented in the intensity map to the bottom of the images, and their merge (right)  
 232 during the early stage ('Horsetail', top) and late stage ('Ascus', bottom) of meiosis. (B) Plot of  
 233 mean normalized intensities of RFP (magenta line) and GFP (green line) across the length of  
 234 the cell from the cross indicated in A ( $n=33$ ). Shaded regions represent SEM. (C) Maximum

235 intensity-projected images of dynein (left) and mitochondria (center) represented in the  
236 intensity map to the bottom of the images, and their merge (right, strain SV91 stained with  
237 MitoTracker Deep Red). White arrowheads point to representative dynein spots on the cortex  
238 and line 1 and 2 are drawn along the spots whose intensities are plotted in D. **(D)** Normalized  
239 intensity of dynein (green) and mitochondria (magenta) along the arrowheads and lines  
240 indicated in C. **(E)** Schematic of uniparental mitochondrial inheritance in fission yeast  
241 mediated by the tethering of parental mitochondria to the cortex by the dynein anchor Mcp5.  
242 In A and C, scale bars represent 2 $\mu$ m, dashed white lines represent cell outlines.

243

244           Since we discovered that the CC domain of Mcp5 not only binds dynein, but also  
245 mitochondria, we asked if Mcp5 spots containing dynein clusters were capable of tethering  
246 mitochondria. We answered this question by visualizing and measuring the colocalization of  
247 dynein-GFP spots and Mitotracker-stained mitochondria (Figure 4C). A typical fission yeast  
248 zygote exhibits 1-3 cortical dynein spots that are anchored at Mcp5 foci (Thankachan et al.,  
249 2017; Tolic et al., 2009). We observed that only 3 of 23 dynein spots ( $n= 11$  zygotes), also  
250 localized with mitochondria (Figure 4D, Movie S14), indicating that Mcp5 foci that anchored  
251 dynein were typically precluded from tethering mitochondria. This result could explain the  
252 slightly better mitochondrial segregation phenotype that we observed in Figure 4A and B,  
253 since the lack of dynein in these zygotes made a few more Mcp5 foci available for binding by  
254 the mitochondria.

255           A schematic summarizing these results is depicted in Figure 4E.

256

## 257 Discussion

258 Uniparental mitochondrial inheritance is a common feature among several  
259 eukaryotes, including unicellular fungi such as *Cryptococcus neoformans* and *Ustilago*  
260 *maydis*. In *C. neoformans*, mitochondria from the MAT $\alpha$  parent are selectively passed on to  
261 progeny by an as yet unknown degradation mechanism that affects the MAT $\alpha$  mitochondria  
262 (Yan and Xu, 2003; Yan et al., 2007). In *U. maydis*, the a2 strain, and not a1, contributes all of  
263 the mitochondria by employing a mechanism that protects a2 mitochondria from degradation  
264 due to the interaction of two genes at the a2 mating type locus, Rga2 and Lga2 (Fedler et al.,  
265 2009). In mammalian cells, sperm mitochondria typically enter the oocyte post fertilization,  
266 but then undergo selective ubiquitination and proteolysis thereby effecting maternal  
267 mitochondrial inheritance in the progeny (Sutovsky et al., 1999, 2000).

268 Here, we have discovered that the unicellular yeast, *S. pombe* also undergoes  
269 uniparental mitochondrial inheritance. The progeny of a meiotic cross are thus homoplasmic  
270 for either the h<sup>+</sup> or h<sup>-</sup> parental mitochondria. *S. pombe* achieves uniparental inheritance by  
271 employing the anchor protein of dynein, Mcp5, to tether mitochondria to the cortex during  
272 meiotic prophase. While this mechanism relies on segregating mitochondria by their  
273 anchoring to the cortex, other segregation methods are also possible such as the chloroplast  
274 inheritance mechanism in the green alga *Cylindrocapsa*, where the two chloroplasts from each  
275 parent in the zygote do not mix or divide and are then individually distributed to the four  
276 meiotic products (Smith, 1950).

277 In *S. cerevisiae*, Num1 and Mdm36, which are key components of MECA, serve to  
278 anchor mitochondria in the mother cell during mitotic anaphase (Lackner et al., 2013). In  
279 contrast to fission yeast, Num1 does not participate in the tethering of mitochondria to the  
280 cortex during *S. cerevisiae* meiosis due to the programmed destruction of MECA by Ime2-

281 dependent phosphorylation (Sawyer et al., 2018). In *S. pombe*, the expression profile of Mcp5  
282 peaks during meiotic prophase and drops to zero in the subsequent stages (Saito et al., 2006;  
283 Yamashita and Yamamoto, 2006) ensuring that while mitochondria are anchored to the  
284 cortex during the earliest stages of meiosis, mitochondria are dissociated from the membrane  
285 prior to meiotic divisions I and II.

286 In budding yeast, Num1 cluster formation requires mitochondrial attachment and the  
287 resulting clusters of Num1 are required for dynein anchoring (Kraft and Lackner, 2017; Schmit  
288 et al., 2018). In these cells, mitochondria and dynein occupy the same Num1 clusters, with  
289 both dynein and mitochondria binding to Num1's CC domain (Lammers and Markus, 2015).  
290 While we too found that Mcp5's CC domain was required for binding to mitochondria, we  
291 observed that distinct populations of Mcp5 clusters are required to anchor dynein and  
292 mitochondria. Num1 clusters might accommodate both mitochondria and dynein by making  
293 a fraction of molecules in the clusters available for dynein binding after mitochondrial  
294 association. In fission yeast, the number of dynein molecules that form a cluster is roughly  
295 equal to the number of Mcp5 molecules that make up a focus at the cortex  
296 (Ananthanarayanan et al., 2013; Thankachan et al., 2017). Therefore, our results are likely a  
297 reflection of the stoichiometry of binding between Mcp5 and dynein, that does not allow for  
298 mitochondrial binding to a pre-existing Mcp5-dynein spot.

299 In conclusion, we report that fission yeast achieves uniparental mitochondrial  
300 inheritance by anchoring and thereby segregating parental mitochondria during the earliest  
301 stages of meiosis. Future studies will help us understand what the role of uniparental  
302 inheritance is in wild-type cells and what the consequence of perturbation of this  
303 phenomenon would be, particularly in context of deleterious mtDNA mutations.

304



## 305 **Acknowledgements**

306 We thank A. Jeevanavar and H. Honey for help with construction of strains; High Content  
307 Imaging Facility, BSSE, IISc, and P. I. Rajyaguru for the use of the InCell 6000, and Deltavision  
308 RT microscopes respectively; P. Delivani, F. Ishikawa, M. Takaine, I. Tolic, P. Tran, and NBRP  
309 Japan for yeast strains and constructs; L. A. Chacko for fruitful discussions. The research was  
310 supported by the Department of Science and Technology (India)-INSPIRE Faculty Award, the  
311 Department of Biotechnology (India) Innovative Young Biotechnologist Award, and the  
312 Science and Engineering Research Board (SERB, India) Early Career Research Award awarded  
313 to V.A.

314

## 315 **Author contributions**

316 KM and VA carried out all the experiments. VA designed the research, analyzed the data,  
317 prepared the figures, and wrote the paper.

318

## 319 **Declaration of interests**

320 The authors declare no competing interests.

321

## 322 **References**

323 Altmann, K., Frank, M., Neumann, D., Jakobs, S., and Westermann, B. (2008). The class V  
324 myosin motor protein, Myo2, plays a major role in mitochondrial motility in *Saccharomyces*  
325 *cerevisiae*. *J. Cell Biol.*

326 Ananthanarayanan, V. (2016). Activation of the motor protein upon attachment: Anchors  
327 weigh in on cytoplasmic dynein regulation. *BioEssays* 38, 514–525.

328 Ananthanarayanan, V., Schattat, M., Vogel, S.K., Krull, A., Pavin, N., Tolic-Norrelykke, I.M., and

329 Tolić-Nørrelykke, I.M. (2013). Dynein motion switches from diffusive to directed upon cortical  
330 anchoring. *Cell* 153, 1526–1536.

331 Birky, C.W. (1995). Uniparental inheritance of mitochondrial and chloroplast genes:  
332 Mechanisms and evolution (organelles/non-Mendelian inheritance/maternal inheritance).

333 Chiron, S., Bobkova, A., Zhou, H., and Yaffe, M.P. (2008). CLASP regulates mitochondrial  
334 distribution in *Schizosaccharomyces pombe*. *J. Cell Biol.* 182, 41–49.

335 Cipak, L., Polakova, S., Hyppa, R.W., Smith, G.R., and Gregan, J. (2014). Synchronized fission  
336 yeast meiosis using an ATP analog-sensitive Pat1 protein kinase. *Nat. Protoc.*

337 Fedler, M., Luh, K.S., Stelter, K., Nieto-Jacobo, F., and Basse, C.W. (2009). The a2 mating-type  
338 locus genes *lga2* and *rga2* direct uniparental mitochondrial DNA (mtDNA) inheritance and  
339 constrain mtDNA recombination during sexual development of *Ustilago maydis*. *Genetics*.

340 Förtsch, J., Hummel, E., Krist, M., and Westermann, B. (2011). The myosin-related motor  
341 protein Myo2 is an essential mediator of bud-directed mitochondrial movement in yeast. *J.*  
342 *Cell Biol.*

343 Fu, C., Jain, D., Costa, J., Velve-Casquillas, G., and Tran, P.T. (2011). Mmb1p binds  
344 mitochondria to dynamic microtubules. *Curr. Biol.* 21, 1431–1439.

345 Haffter, P., and Fox, T.D. (1992). Nuclear mutations in the petite-negative yeast  
346 *Schizosaccharomyces pombe* allow growth of cells lacking mitochondrial DNA. *Genetics* 131.

347 Hoekstra, R.F. (2000). Evolutionary origin and consequences of uniparental mitochondrial  
348 inheritance. In *Human Reproduction*, p.

349 Kraft, L.M., and Lackner, L.L. (2017). Mitochondria-driven assembly of a cortical anchor for  
350 mitochondria and dynein. *J. Cell Biol.*

351 Lackner, L.L., Ping, H., Graef, M., Murley, A., and Nunnari, J. (2013). Endoplasmic reticulum-  
352 associated mitochondria-cortex tether functions in the distribution and inheritance of

353 mitochondria. *Proc. Natl. Acad. Sci.* *110*, E458-67.

354 Lammers, L.G., and Markus, S.M. (2015). The dynein cortical anchor Num1 activates dynein  
355 motility by relieving Pac1/LIS1-mediated inhibition. *J. Cell Biol.* *211*, 309–322.

356 Mehta, K., Chacko, L.A., Chug, M.K., Jhunjhunwala, S., and Ananthanarayanan, V. (2019).  
357 Association of mitochondria with microtubules inhibits mitochondrial fission by precluding  
358 assembly of the fission protein Dnm1. *J. Biol. Chem.* jbc.RA118.006799.

359 Murlas Cosmides, L., and Tooby, J. (1981). Cytoplasmic inheritance and intragenomic conflict.  
360 *J. Theor. Biol.*

361 Nunnari, J., Marshall, W.F., Straight, a, Murray, a, Sedat, J.W., and Walter, P. (1997).  
362 Mitochondrial transmission during mating in *Saccharomyces cerevisiae* is determined by  
363 mitochondrial fusion and fission and the intramitochondrial segregation of mitochondrial  
364 DNA. *Mol. Biol. Cell* *8*, 1233–1242.

365 Ping, H.A., Kraft, L.M., Chen, W.T., Nilles, A.E., and Lackner, L.L. (2016). Num1 anchors  
366 mitochondria to the plasma membrane via two domains with different lipid binding  
367 specificities. *J. Cell Biol.*

368 Saito, T.T., Okuzaki, D., and Nojima, H. (2006). Mcp5, a meiotic cell cortex protein, is required  
369 for nuclear movement mediated by dynein and microtubules in fission yeast. *J. Cell Biol.* *173*,  
370 27–33.

371 Sawyer, E.M., Joshi, P.R., Jorgensen, V., Yunus, J., Berchowitz, L.E., and Ünal, E. (2018).  
372 Developmental regulation of an organelle tether coordinates mitochondrial remodeling in  
373 meiosis. *J. Cell Biol.* jcb.201807097.

374 Schmit, H.L., Kraft, L.M., Lee-Smith, C.F., and Lackner, L.L. (2018). The role of mitochondria in  
375 anchoring dynein to the cell cortex extends beyond clustering the anchor protein. *Cell Cycle*  
376 *17*, 1345.

- 377 Smith, G.M. (1950). *The Fresh-Water Algae of the United States* (McGraw Hill, New York).
- 378 Strausberg, R.L., and Perlman, P.S. (1978). The effect of zygotic bud position on the  
379 transmission of mitochondrial genes in *Saccharomyces cerevisiae*. *MGG Mol. Gen. Genet.*
- 380 Sukhorukov, V.M., Dikov, D., Busch, K., Strecker, V., Wittig, I., and Bereiter-Hahn, J. (2010).  
381 Determination of protein mobility in mitochondrial membranes of living cells. *Biochim.*  
382 *Biophys. Acta - Biomembr.* *1798*, 2022–2032.
- 383 Sutovsky, P., Moreno, R.D., Ramalho-Santos, J., Dominko, T., Simerly, C., and Schatten, G.  
384 (1999). Ubiquitin tag for sperm mitochondria. *Nature*.
- 385 Sutovsky, P., Moreno, R.D., Ramalho-Santos, J., Dominko, T., Simerly, C., and Schatten, G.  
386 (2000). Ubiquitinated Sperm Mitochondria, Selective Proteolysis, and the Regulation of  
387 Mitochondrial Inheritance in Mammalian Embryos 1.
- 388 Thankachan, J.M., Nuthalapati, S.S., Addanki Tirumala, N., and Ananthanarayanan, V. (2017).  
389 Fission yeast myosin I facilitates PI(4,5)P<sub>2</sub>-mediated anchoring of cytoplasmic dynein to the  
390 cortex. *Proc. Natl. Acad. Sci. U. S. A.* *114*, E2672–E2681.
- 391 Thomas, D.Y., and Wilkie, D. (1968). Recombination of mitochondrial drug-resistance factors  
392 in *Saccharomyces cerevisiae*. *Biochem. Biophys. Res. Commun.*
- 393 Thrailkill, K.M., Birkey, C.W., Lueckemann, G., and Wolf, K. (1980). Intracellular population  
394 genetics: Evidence for random drift of mitochondrial allele frequencies in *Saccharomyces*  
395 *cerevisiae* and *Schizosaccharomyces pombe*. *Genetics*.
- 396 Tolic, I.M., Vogel, S.K., Pavin, N., Maghelli, N., Ju, F., Jülicher, F., and Tolić-Nørrelykke, I.M.  
397 (2009). Self-organization of dynein motors generates meiotic nuclear oscillations. *PLoS Biol.*  
398 *7*, 0918–0928.
- 399 Williamson, D.H., and Fennell, D.J. (1979). Visualization of yeast mitochondrial dna with the  
400 fluorescent stain “DAPI.” In *Methods in Enzymology*, (Academic Press), pp. 728–733.

401 Wilson, A.J., and Xu, J. (2012). Mitochondrial inheritance: diverse patterns and mechanisms  
402 with an emphasis on fungi Mitochondrial inheritance: diverse patterns and mechanisms with  
403 an emphasis on fungi. *Mycology* 3, 158–166.

404 Yaffe, M., Harata, D., Verde, F., Eddison, M., Toda, T., and Nurse, P. (1996). Microtubules  
405 mediate mitochondrial distribution in fission yeast. *Proc. Natl. Acad. Sci.* 93, 11664–11668.

406 Yamamoto, A., West, R.R., Mcintosh, J.R., and Hiraoka, Y. (1999). A Cytoplasmic Dynein Heavy  
407 Chain Is Required for Oscillatory Nuclear Movement of Meiotic Prophase and Efficient Meiotic  
408 Recombination in Fission Yeast. *J. Cell Biol.* 145, 1233–1249.

409 Yamashita, A., and Yamamoto, M. (2006). Fission Yeast Num1p Is a Cortical Factor Anchoring  
410 Dynein and Is Essential for the Horse-Tail Nuclear Movement During Meiotic Prophase.  
411 *Genetics* 1196, 1187–1196.

412 Yan, Z., and Xu, J. (2003). Mitochondria are inherited from the MATa parent in crosses of the  
413 basidiomycete fungus *Cryptococcus neoformans*. *Genetics*.

414 Yan, Z., Hull, C.M., Sun, S., Heitman, J., and Xu, J. (2007). The mating type-specific  
415 homeodomain genes *SXI1α* and *SXI2a* coordinately control uniparental mitochondrial  
416 inheritance in *Cryptococcus neoformans*. *Curr. Genet.*

417 Yu, H.S., and Russell, S.D. (1992). Male cytoplasmic diminution and male germ unit in young  
418 and mature pollen of *Cymbidium goeringii*: a 3-dimensional and quantitative study. *Sex. Plant*  
419 *Reprod.*

420 Zinn, A.R., Pohlman, J.K., Perlman, P.S., and Butow, R.A. (1987). Kinetic and segregational  
421 analysis of mitochondrial DNA recombination in yeast. *Plasmid*.

422
